# Supplementary material for: Co-occurrence of Fe and P stress in natural populations of the marine diazotroph Trichodesmium
Source: Copernicus journal article supplement (doi:10.5194/bg-17-2537-2020), 2020-05-12
Supplement: Supplementary file 1 [file bg-17-2537-2020-supplement.zip]

**Supplementary Information for “Co-occurrence of Fe and P stress in natural populations of the marine diazotroph *Trichodesmium*.”**

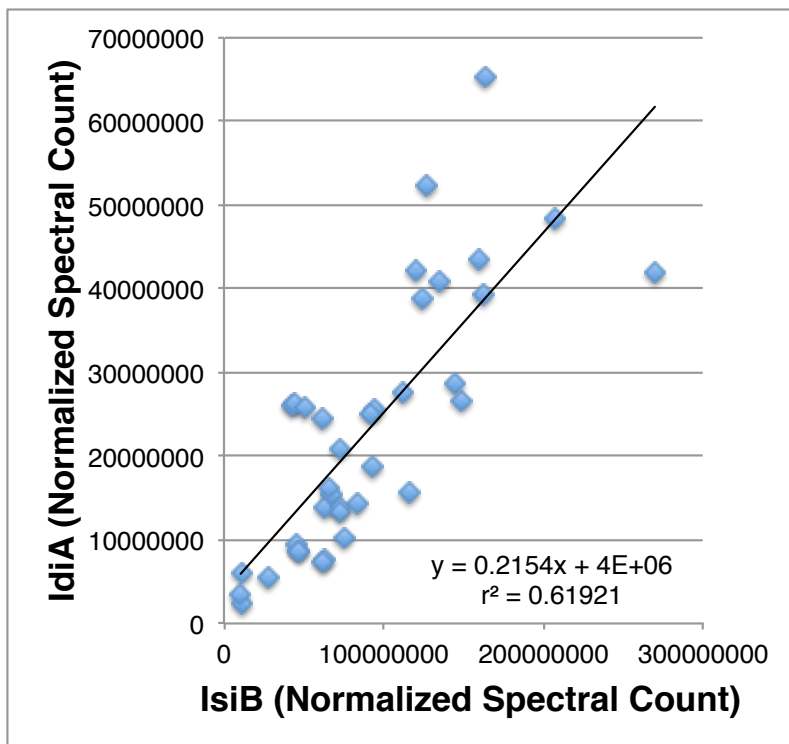

**Figure S1. Relative abundance of IdiA and IsiB. Both are biomarkers of iron stress in *Trichodesmium*, and behave similarly in this dataset.**

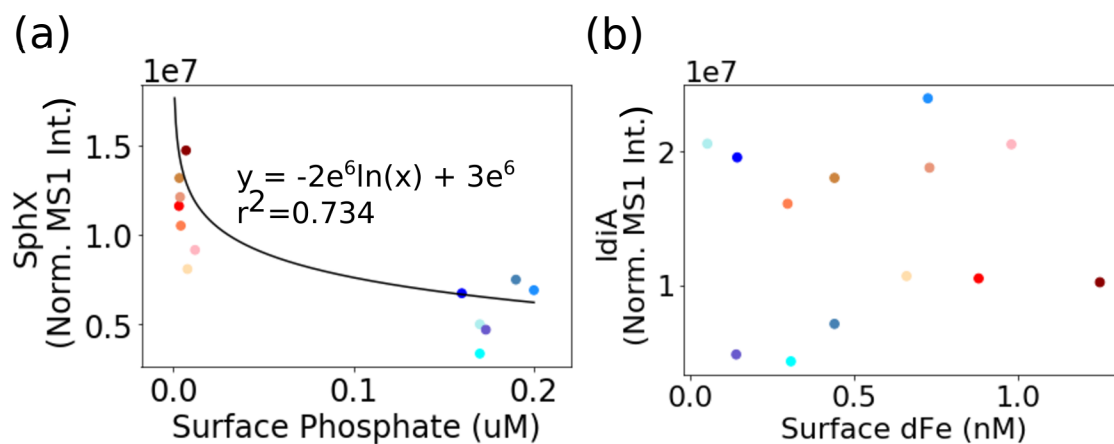

**Figure S2. Scatter plot of A) SphX versus surface phosphate and B) IdiA versus surface dFe values. Note that analytical differences between JC150 (red dots) and Tricolim (blue dots) may be forcing the relationship with the surface phosphate values, though all values are above the reported limit of detection.**

\*Note: Tables S3, S4, S6 are provided as excel files due to their large size

**Table S1.** Important Fe and P stress biomarkers in *Trichodesmium*

| Name | Nutrient sensed | <i>T. erythraeum</i> sp. IMS101 gene name | Gene name in metagenome used in this study (IMG ID 2821474806 ) |
|------|-----------------|-------------------------------------------|-----------------------------------------------------------------|
| IdiA | Fe              | Tery_3377                                 | TCCM_0877.00000020                                              |
| PstS | Phosphate       | Tery_3537                                 | TCCM_0018.00000050                                              |
| SphX | Phosphate       | Tery_3534                                 | TCCM_0018.00000040                                              |

**Table S2.** Sample provenance information

| Name        | Replication | Cruise   | Cruise station # | Time sampled | Date sampled | Net size (uM) | Filter size | Latitude | Longitude |
|-------------|-------------|----------|------------------|--------------|--------------|---------------|-------------|----------|-----------|
| JC150_03    | triplicate  | JC150    | 3                | pre-dawn     | 7/10/17      | 200           | 0.2uM       | 22       | -50       |
| JC150_04    | singlicate  | JC150    | 4                | pre-dawn     | 7/14/17      | 200           | 0.4uM       | 23.22    | -44.47    |
| JC150_05    | triplicate  | JC150    | 5                | pre-dawn     | 7/19/17      | 200           | 0.4uM       | 23       | -39.6     |
| JC150_06    | singlicate  | JC150    | 6                | pre-dawn     | 7/24/17      | 200           | 0.4uM       | 22.19    | -35.53    |
| JC150_07    | triplicate  | JC150    | 7                | pre-dawn     | 7/29/17      | 200           | 0.4uM       | 22       | -31       |
| JC150_01    | triplicate  | JC150    | 1                | pre-dawn     | 7/3/17       | 200           | 0.2uM       | 22       | -58       |
| JC150_02    | duplicate   | JC150    | 2                | pre-dawn     | 7/4/17       | 200           | 0.2uM       | 21.26    | -54       |
| Tricolim_18 | triplicate  | Tricolim | 18               | pre-dawn     | 3/9/18       | 130           | 0.2uM       | 13.38    | -55.5     |
| Tricolim_15 | triplicate  | Tricolim | 15               | pre-dawn     | 3/5/18       | 130           | 0.2uM       | 5.0239   | -44.1836  |
| Tricolim_19 | triplicate  | Tricolim | 19               | pre-dawn     | 3/11/18      | 130           | 0.2uM       | 16.5     | -57.5     |
| Tricolim_14 | duplicate   | Tricolim | 14               | afternoon    | 3/1/18       | 130           | 0.2uM       | 2.36061  | -39.591   |
| Tricolim_15 | singlicate  | Tricolim | 15               | 9            | 3/3/18       | 130           | 0.2uM       | 5.0239   | -44.1836  |
| Tricolim_03 | duplicate   | Tricolim | 3                | 11:30        | 2/15/18      | 130           | 0.2uM       | 12.13    | -21.59    |
| Tricolim_16 | duplicate   | Tricolim | 16               | 14:45        | 3/4/18       | 130           | 0.2uM       | 7.3      | -48.29    |
| Tricolim_13 | singlicate  | Tricolim | 13               | 15:00        | 2/27/18      | 130           | 0.2uM       | 0.17976  | -30.3984  |
| HOT_01      | duplicate   | HOT 117  | n/a              | 13:30        | 7/27/00      | 130           | 5uM         | 22.45    | -158      |
| BATS_01     | singlicate  | BATS     | n/a              | morning      | 2/4/15       | 200           | 0.2uM       | 31.4     | -64.1     |

**Table S5.** Absolute abundance of the PstA protein and calculation of surface area occupied. See Table S6 for list of peptide transition ions used for quantification.

Assuming 30% w/w cyanobacteria protein content (Gonzalez Lopez et al., 2010) - lower bound

Assume a cylindrical cell of height 15um, width 11um (Bergmann et al., 2013)

cell volume (um<sup>3</sup>) 1424.8

cell surface area (um<sup>2</sup>) 708.07

Assume average protein contains 0.53 g C / g protein (Rouwenhorst et al)

Assume ATP transporter has cross sectional area of 1.66e-5 um<sup>2</sup> (Hudson and Morel 1992)

| pg C per cell | pg C in protein | pg protein/cell | ug protein/cell |
|---------------|-----------------|-----------------|-----------------|
| 86.65         | 26.00           | 49.05           | 0.00005         |

from cell volume per Strathman 1967

| Station     | Avg [Pst] total protein | fmol/ug | St Dev | fmol protein per cell | Pst molecules per cell | S.A. occupied per cell (um2) | % surface area occupied |
|-------------|-------------------------|---------|--------|-----------------------|------------------------|------------------------------|-------------------------|
| Tricolim_18 | 13.00                   | 1.80    |        | 0.0006                | 383994.82              | 25.34                        | 3.58                    |
| Tricolim_15 | 11.22                   | 3.45    |        | 0.0006                | 331540.40              | 21.88                        | 3.09                    |
| Tricolim_16 | 89.06                   | 123.06  |        | 0.0044                | 2630552.93             | 173.62                       | 24.52                   |
| JC150_3     | 38.73                   | 63.34   |        | 0.0019                | 1143789.85             | 75.49                        | 10.66                   |
| JC150_4     | 89.58                   | 14.74   |        | 0.0044                | 2645858.35             | 174.63                       | 24.66                   |
| JC150_5     | 74.24                   | 36.42   |        | 0.0036                | 2192888.10             | 144.73                       | 20.44                   |
| JC150_6     | 61.64                   | 40.07   |        | 0.0030                | 1820590.66             | 120.16                       | 16.97                   |
| JC150_7     | 165.72                  |         |        | 0.0081                | 4894655.41             | 323.05                       | 45.62                   |
| JC150_1     | 106.08                  |         |        | 0.0052                | 3133303.68             | 206.80                       | 29.21                   |
|             |                         |         |        |                       | average                |                              | 19.86                   |

Assuming 55% w/w cyanobacteria protein content (Gonzalez Lopez et al., 2010) - upper bound

Assume a cylindrical cell of height 15um, width 11um

| pg C per cell | pg C in protein | pg protein/cell | ug protein/cell |
|---------------|-----------------|-----------------|-----------------|
| 86.65         | 47.66           | 89.92           | 0.00009         |

| Station     | Avg [Pst] total protein | St Dev | fmol protein per cell | Pst molecules per cell | S.A. occupied per cell (um2) | % surface area occupied |
|-------------|-------------------------|--------|-----------------------|------------------------|------------------------------|-------------------------|
| Tricolim_18 | 13.00                   | 1.80   | 0.0012                | 703990.50              | 46.46                        | 6.56                    |
| Tricolim_15 | 11.22                   | 3.45   | 0.0010                | 607824.06              | 40.12                        | 5.67                    |
| Tricolim_16 | 89.06                   | 123.06 | 0.0080                | 4822680.37             | 318.30                       | 44.95                   |
| JC150_3     | 38.73                   | 63.34  | 0.0035                | 2096948.06             | 138.40                       | 19.55                   |
| JC150_4     | 89.58                   | 14.74  | 0.0081                | 4850740.31             | 320.15                       | 45.21                   |
| JC150_5     | 74.24                   | 36.42  | 0.0067                | 4020294.85             | 265.34                       | 37.47                   |
| JC150_6     | 61.64                   | 40.07  | 0.0055                | 3337749.54             | 220.29                       | 31.11                   |
| JC150_7     | 165.72                  |        | 0.0149                | 8973534.91             | 592.25                       | 83.64                   |
| JC150_1     | 106.08                  |        | 0.0095                | 5744390.09             | 379.13                       | 53.54                   |
|             |                         |        |                       | average                |                              | 36.41                   |

**Table S6.** Transition ions used for PstA protein quantification (peptide ATDEALQIVPR)

|                            |                |
|----------------------------|----------------|
| <b>Peptide ATDEALQIVPR</b> | y8 - 925.5465+ |
|                            | y7 - 796.5039+ |
|                            | b3 - 288.1190+ |
|                            | b4 - 417.1616+ |
|                            | b5 - 488.1987+ |
|                            | b6 - 601.2828+ |

**Table S7.** All peptides targeted in PRM mode (note only PstA data reported here)

| <b>Description</b>                                    | <b>Tery #</b> | <b>Metagenome ID</b>   | <b>Peptide</b>      |
|-------------------------------------------------------|---------------|------------------------|---------------------|
| IdiA periplasmic binding                              | Tery_3<br>377 | TCCM_0877.000<br>00020 | IFSEGNNEYPVVAGIPIAT |
|                                                       |               |                        | VLK                 |
|                                                       |               |                        | HYDTDQALYDSFTQK     |
|                                                       |               |                        | FLEHLVSPEAQK        |
| phosphate ATP binding<br>protein PstB                 | Tery_3<br>540 | TCCM_0018.000<br>00090 | ILYHDQNIYDPDIDPVEIR |
|                                                       |               |                        | LGQSGFALSGGQQQR     |
|                                                       |               |                        | NIDQQNSAAALSAEK     |
|                                                       |               |                        | IADVTAFFNAK         |
| phosphate permease PstA                               | Tery_3<br>539 | TCCM_0018.000<br>00080 | ATDEALQIVPR         |
|                                                       |               |                        | GPLSPTLPSLAYLVYEFSR |
|                                                       |               |                        | VLIPAAFSGIVGGVMLGL  |
|                                                       |               |                        | GR                  |
| phosphate permease PstC                               | Tery_3<br>538 | TCCM_0018.000<br>00070 | AMGETMAVTMLIGNANS   |
|                                                       |               |                        | IK                  |
|                                                       |               |                        | GAIGYIEFGFAK        |
|                                                       |               |                        | INLVGAGASFPAPLYQR   |
| SphX periplasmic binding                              | Tery_3<br>534 | TCCM_0018.000<br>00040 | NSGFEVQVDYQSVGSGA   |
|                                                       |               |                        | GIER                |
|                                                       |               |                        | EVYVDILLGNIK        |
|                                                       |               |                        | NDGVTAQITQTEGAIGYV  |
| PstS periplasmic binding<br>less phosphate responsive | Tery_3<br>537 | TCCM_0018.000<br>00050 | EYGYAK              |
|                                                       |               |                        | VSPELGYIPLPDNVR     |
|                                                       |               |                        | YIEPTFESAEATLGAVAL  |
|                                                       |               |                        | PENLR               |
| flavodoxin                                            |               | TCCM_0640.000<br>00010 | IGLFLGTTTGK         |
|                                                       |               |                        | FVGLALDDDNQAELTDE   |
|                                                       |               |                        | R                   |

**Table S8.** Literature values for IdiA as a biomarker of Fe stress

| <b>Study</b>             | <b>Fe addition<br/>replete (nM)</b> | <b>Fe addition<br/>deplete (nM)</b> | <b>IdiA fold change</b>                                        |
|--------------------------|-------------------------------------|-------------------------------------|----------------------------------------------------------------|
| Webb et al., 2001        | 50                                  | 0                                   | 1.54                                                           |
| Walworth et al.,<br>2016 | 250                                 | 10                                  | 1.07 at 380 pCO <sub>2</sub> ,<br>1.31 at 780 pCO <sub>2</sub> |
| Snow et al., 2015        | 120                                 | 0                                   | 2.38                                                           |

\*Note that while the cells in Walworth, et al., 2016 were clearly Fe-limited according to growth rate measurements, they had access to 10 nM total iron as opposed to 0 nM total iron for the other experiments. This may explain the discrepancy in the IdiA fold change values.

**Table S9.** Literature values for SphX as a biomarker of P stress

| <b>Study</b>               | <b>P addition replete<br/>(<math>\mu\text{M}</math>)</b> | <b>P addition deplete<br/>(<math>\mu\text{M}</math>)</b> | <b>SphX fold change</b>                                        |
|----------------------------|----------------------------------------------------------|----------------------------------------------------------|----------------------------------------------------------------|
| Walworth et al.,<br>2016   | 0.25                                                     | 10                                                       | 2.64 at 380 pCO <sub>2</sub> ,<br>3.10 at 780 pCO <sub>2</sub> |
| Frischkorn et al.,<br>2019 | 0                                                        | 50                                                       | 2.62                                                           |
