# Supplementary material for: Co-occurrence of Fe and P stress in natural populations of the marine diazotroph Trichodesmium
Source: Copernicus journal article supplement (doi:10.5194/bg-17-2537-2020), 2020-05-12
Supplement: Supplementary file 2 [file bg-17-2537-2020-supplement.zip]

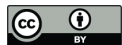

*Supplement of*

## **Co-occurrence of Fe and P stress in natural populations of the marine diazotroph *Trichodesmium***

Noelle A. Held et al.

*Correspondence to:* Mak A. Saito (msaito@whoi.edu)

- [bg-17-2537-2020-supplement-title-page.pdf](#)
- [SupplementaryInformation\\_200330.pdf](#)
- [TableS3.xlsx](#)
- [TableS4.xlsx](#)
- [TableS10.xlsx](#)

The copyright of individual parts of the supplement might differ from the CC BY 4.0 License.
